# Supplementary material
Source: publisher figshare collection journal article supplement (https://tandf.figshare.com/ndownloader/files/22714727)
Supplement: Supplementary file 1 [file 22714727]

**Supplementary Table 1: Primer sequences used in this study**

1. **RT-qPCR primers**

| **Genes** | **Forward primer (5′-3′)** | **Reverse primer (5′-3′)** |
| --- | --- | --- |
| PD-L1 | TGGCATTTGCTGAACGCATTT | TGCAGCCAGGTCTAATTGTTTT |
| Galectin-9 | GGGCGCAGACAAAAACCTC | GGAGTAGAGAACATCTGTCCAGG |
| ARG1 | GTGGAAACTTGCATGGACAAC | AATCCTGGCACATCGGGAATC |
| TIM-3 | TCCAAGGATGCTTACCACCAG | GCCAATGTGGATATTTGTGTTAGATT |
| MMP9 | TGTACCGCTATGGTTACACTCG | GGCAGGGACAGTTGCTTCT |
| VISTA | ACGCCGTATTCCCTGTATGTC | TTGTAGAAGGTCACATCGTGC |
| TGF-β1 | GGCCAGATCCTGTCCAAGC | GTGGGTTTCCACCATTAGCAC |
| TET2 | GATAGAACCAACCATGTTGAGGG | TGGAGCTTTGTAGCCAGAGGT |
| TET3 | GCCGGTCAATGGTGCTAGAG | CGGTTGAAGGTTTCATAGAGCC |
| DNMT3a | CCGATGCTGGGGACAAGAAT | CCCGTCATCCACCAAGACAC |
| DNMT3b | AGGGAAGACTCGATCCTCGTC | GTGTGTAGCTTAGCAGACTGG |
| β-ACTIN | AGAGCTACGAGCTGCCTGAC | AGCACTGTGTTGGCGTACAG |

1. **PCR primers for CpG methylation analysis**

| **Genes** | **Forward primer (5′-3′)** | **Reverse primer (5′-3′)** |
| --- | --- | --- |
| PD-L1 promoter | TTGTTTTGGGTAGAGGTGGG | AAAAACCAAATACATTACCTATTCTTA |
| Galectin-9 promoter | AGGAAGTTTTAGGAAGGTTAATATG | ATTAAAAACTCCTCTCCACAACCTT |
| TIM-3 promoter | AGGTTGGAGTGTAATGGTATGATTT | TCAAAAACAACCTAACCAACATAAA |
| VISTA promoter | GGTGTTTTTGTATGTTTGAAATTTAG | AACAACCCTCTAACCTCATTTACTC |
| ARG1 promoter | TAGGAATTGTTGATTTGTTTTTTTT | CCACTACACCCCAACCTAAAC |
| TGF-β1 promoter | GGGTATTTATTAGTTGGTTTGTTTTA | TTAAAAACAAAATCCCTCAACACTC |
| MMP9 promoter | GATGGGGGATTTTTTTAGTTTTATT | TACCCACCTCTACCAACTACCTATC |

**c) Sequencing Primer**

| **Genes** | **Forward primer (5′-3′)** | **Reverse primer (5′-3′)** |
| --- | --- | --- |
| M-13 | TGTAAAACGACGGCCAGT | CAGGAAACAGCTATGACC |
